# Supplementary material for: Street Food and Takeaway Food Purchasing Patterns in Bosnia and Herzegovina
Source: MDPI journal article supplement (doi:10.3390/ijerph19159086), 2022-07-26
Supplement: s1 [file s1]

## Supplementary Material

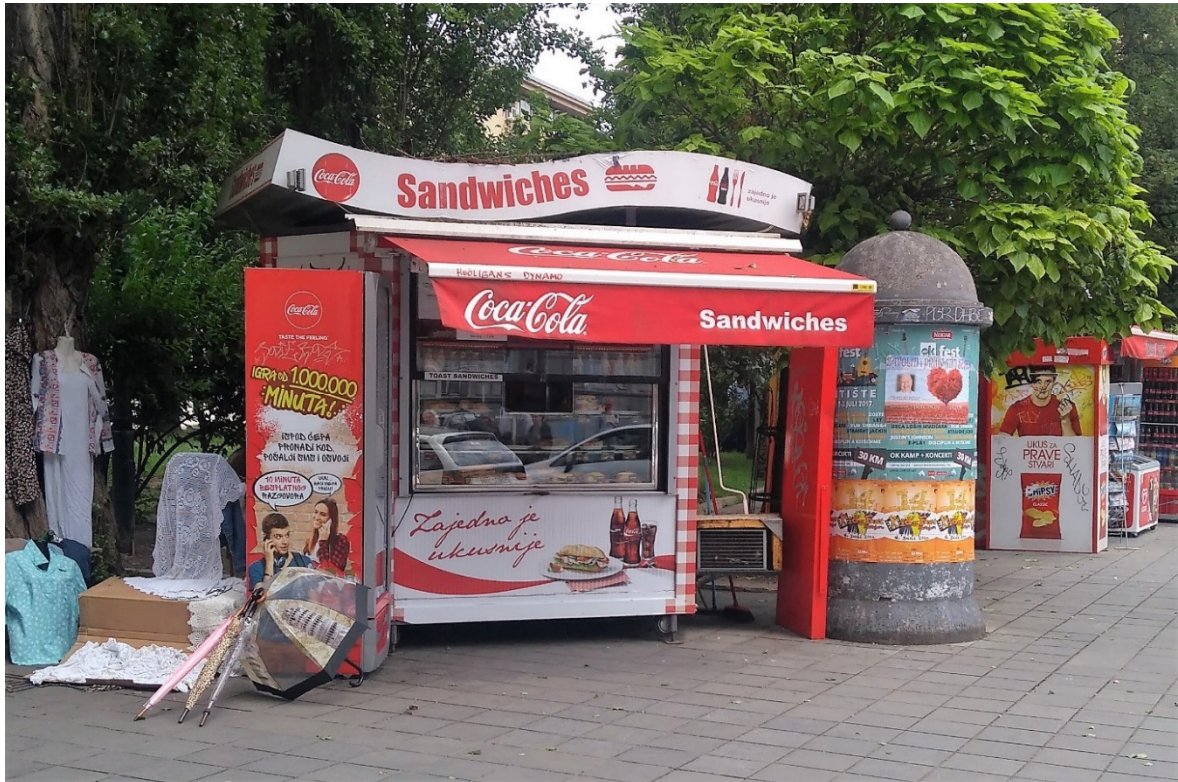

(a)

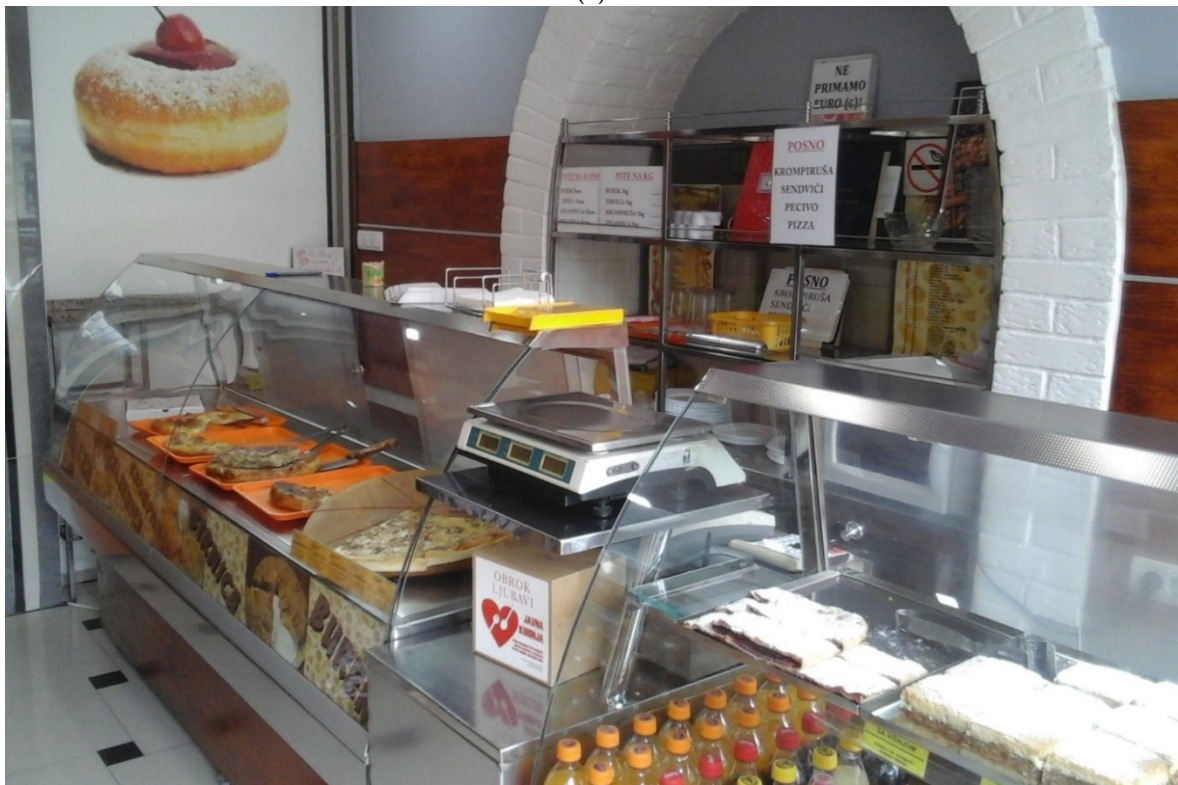

(b)

Figure S1. Examples of (a) a street food vending site, and (b) a takeaway food vending site.

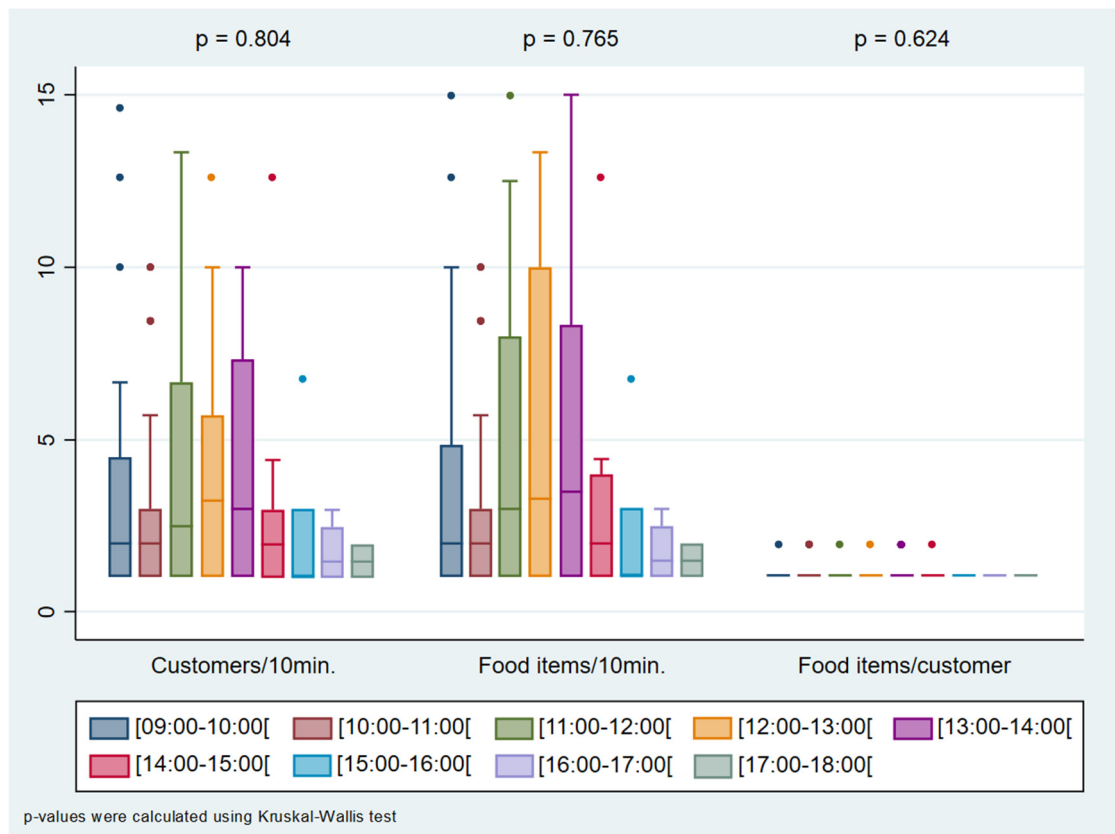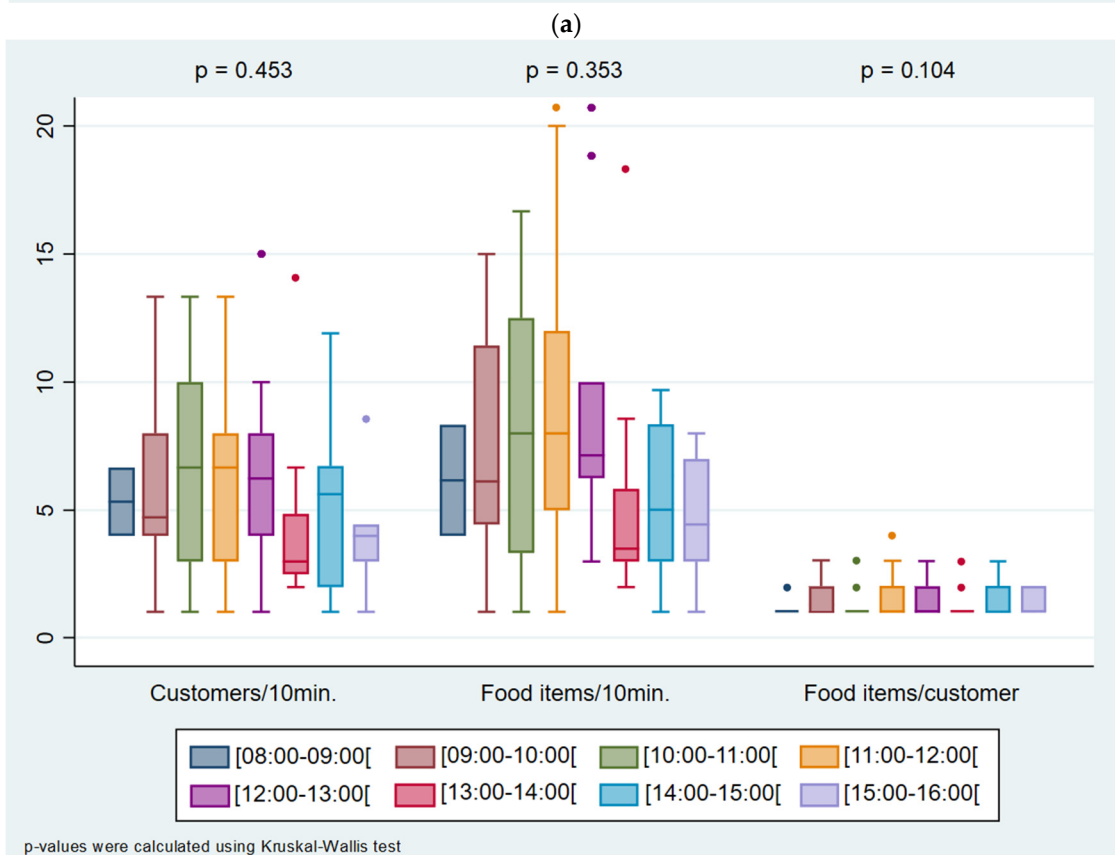

**Figure S2.** Customer influx, food items buying rate and number of food items purchased per customer, in (a) street food and (b) takeaway food vending sites, throughout the day.
